# Supplementary material
Source: Springer Nature journal article supplement (https://www.springermedizin.de/resource/supplementary/12889_2013_5771_MOESM4_ESM.pdf/9496248)

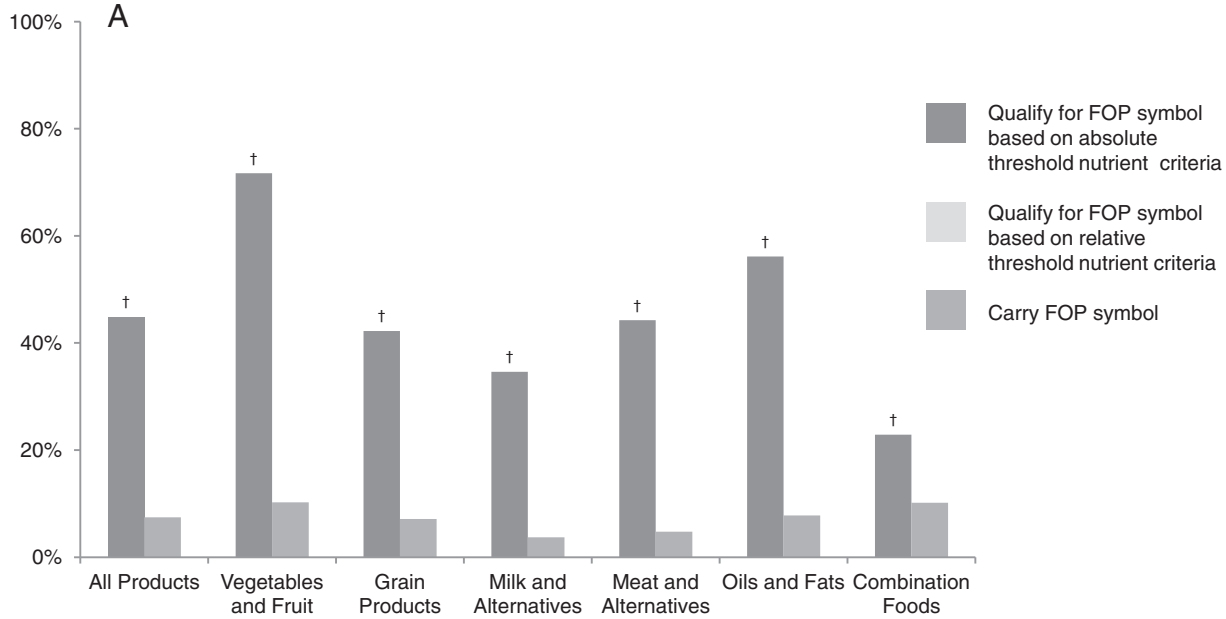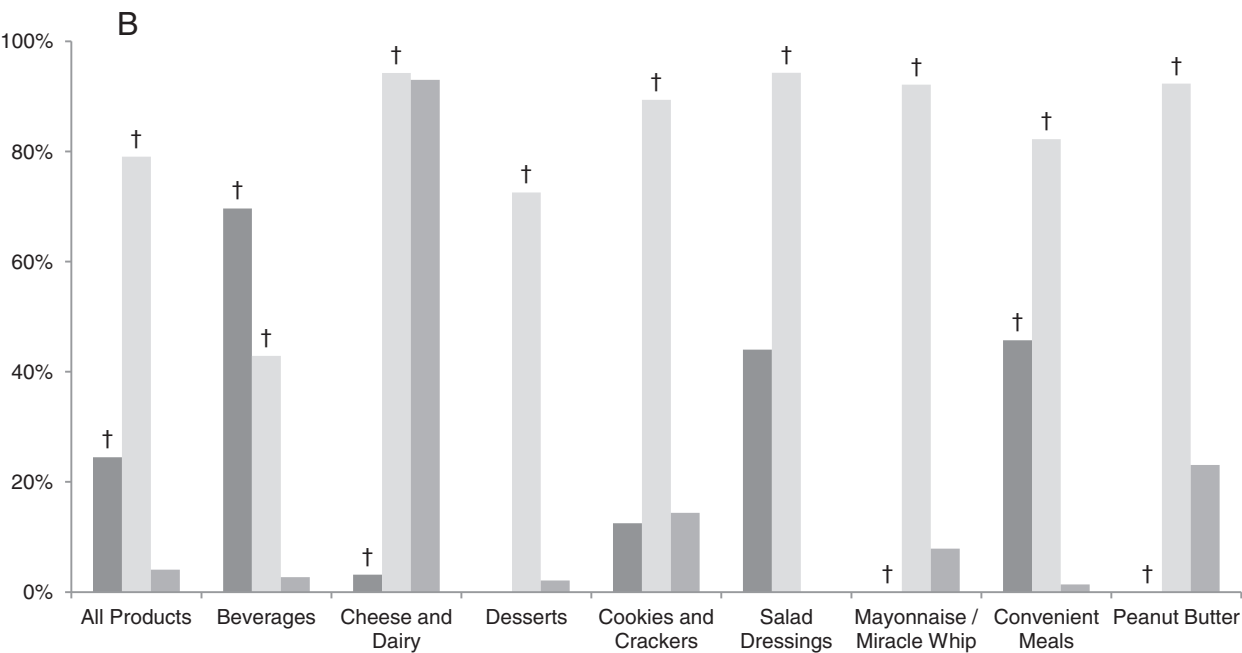

Supplement: MOESM4 [file 9496248]
